# Supplementary material for: Development and characterization of a Flow Focusing multi nebulization system for sample introduction in ICP-based spectrometric techniques
Source: Royal Society of Chemistry journal article supplement (doi:10.1039/b821531f), 2009-01-01
Supplement: b821531f.pdf [file b821531f.pdf]

Energy values for the emission lines studied

| Line type | Element | Wavelength, nm | $E_{\text{ion}}$ , eV | $E_{\text{exc}}$ , eV | $E_{\text{sum}}$ , eV |
|-----------|---------|----------------|-----------------------|-----------------------|-----------------------|
| Atomic    | K I     | 766.490        | (4.34)                | 1.62                  | 1.62                  |
|           | Cu I    | 327.393        | (7.73)                | 3.82                  | 3.82                  |
|           | Li I    | 610.362        | (5.39)                | 3.88                  | 3.88                  |
|           | Zn I    | 213.857        | (9.39)                | 5.80                  | 5.80                  |
|           | Mg I    | 285.213        | (7.65)                | 4.35                  | 4.35                  |
|           | Cd I    | 228.802        | (8.99)                | 5.42                  | 5.42                  |
| Ionic     | Sr II   | 421.546        | 5.69                  | 2.94                  | 8.63                  |
|           | Ba II   | 233.527        | 5.21                  | 6.01                  | 11.22                 |
|           | Mn II   | 257.610        | 7.44                  | 4.81                  | 12.25                 |
|           | Cr II   | 267.716        | 6.76                  | 6.16                  | 12.92                 |
|           | Fe II   | 238.204        | 7.87                  | 5.20                  | 13.07                 |
|           | Ni II   | 221.647        | 7.64                  | 6.63                  | 14.27                 |
|           | Pb II   | 220.353        | 7.42                  | 7.37                  | 14.79                 |
|           | Zn II   | 206.200        | 9.39                  | 6.01                  | 15.40                 |

<sup>a</sup>  $E_{\text{sum}}$  = ionization energy ( $E_{\text{ion}}$ ) + excitation energy ( $E_{\text{exc}}$ ).
